# Supplementary material
Source: publisher figshare collection journal article supplement (https://tandf.figshare.com/ndownloader/files/17888960)
Supplement: Supplementary file 1 [file 17888960]

Supplementary Table 1. Incidence of diagnosed depression per 100,000 and population at risk in both genders at ages 5–12, 13–18 and 19–25 years during 1995–2012

| **Year of diagnosis** | | | | | **Incidence in 5-12 years old** | | | | | **N at risk** | | **Incidence in 13-18 years old** | **N at risk** | **Incidence in 19-25 years old** | **N at risk** |
| --- | --- | --- | --- | --- | --- | --- | --- | --- | --- | --- | --- | --- | --- | --- | --- |
| **1995** | | | | | 0.40 | | | | | 248,696 | | - | - | - | - |
| **1996** | | | | | 4.47 | | | | | 313,208 | | - | - | - | - |
| **1997** | | | | | 7.92 | | | | | 378,858 | | - | - | - | - |
| **1998** | | | | | 35.24 | | | | | 442,633 | | - | - | - | - |
| **1999** | | | | | 31.39 | | | | | 506,463 | | - | - | - | - |
| **2000** | | | | | 63.66 | | | | | 479,094 | | - | - | - | - |
| **2001** | | | | | 103.92 | | | | | 476,323 | | - | - | - | - |
| **2002** | | | | | 92.98 | | | | | 471,081 | | 129.36 | 214,898 | - | - |
| **2003** | | | | | 97.92 | | | | | 462,601 | | 227.09 | 279,183 | - | - |
| **2004** | | | | | 126.52 | | | | | 454,485 | | 296.87 | 343,589 | - | - |
| **2005** | | | | | 129.82 | | | | | 445,243 | | 342.68 | 407,962 | - | - |
| **2006** | | | | | 145.25 | | | | | 436,490 | | 501.08 | 382,174 | - | - |
| **2007** | | | | | 178.89 | | | | | 428,205 | | 627.63 | 382,392 | 274.35 | 150,904 |
| **2008** | | | | | 204.71 | | | | | 423,039 | | 690.46 | 379,311 | 357.20 | 213,326 |
| **2009** | | | | | 198.07 | | | | | 420,562 | | 699.85 | 373,795 | 383.78 | 276,983 |
| **2010** | | | | | 183.89 | | | | | 420,356 | | 685.84 | 366,120 | 423.04 | 340,633 |
| **2011** | | | | | 194.91 | | | | | 422,254 | | 735.34 | 357,656 | 491.55 | 404,231 |
| **2012** | | | | | 208.43 | | | | | 424,123 | | 749.76 | 349,579 | 555.36 | 466,360 |
|  |  |  |  |  |  |  |  |  |  |  |  |  |
